# Supplementary material
Source: PubMed Central journal article supplement (PMC9069343)
Supplement: jamadermatol-e221156-s002.pdf [file jamadermatol-e221156-s002.pdf]

## Supplementary Online Content

Sadik CD, Rashid H, Hammers CM, et al. Evaluation of nomacopan for treatment of bullous pemphigoid: a phase 2a nonrandomized controlled trial. *JAMA Dermatol*. Published online May 4, 2022. doi:10.1001/jamadermatol.2022.1156

**eFigure 1.** Consort Flowchart of the AK801 Trial

**eFigure 2.** BPDAI Subcomponent Scores Over Time for the 9 Patients in the Trial

**eFigure 3.** Total LTB<sub>4</sub> Levels (nM) in the Plasma of Healthy Volunteers (HV), Bullous Pemphigoid (BP) Patients and Paroxysmal Nocturnal Hemoglobinuria (PNH) Patients While Being Treated With Nomacopan

**eTable 1.** Immunopathological Features of the Study Subjects at Screening

**eTable 2.** Summary of Adverse Events (N = 9)

**eTable 3.** Summary of Disease Control and Number of New Lesions by Days of Nomacopan Treatment

**eTable 4.** Individual CH50 Values and Free Nomacopan Concentrations Immediately Before a Dose of Nomacopan

**eTable 5.** Amount of Mometasone (g) Used Each Week by Each Patient Over the First 3 Weeks of Nomacopan Treatment

This supplementary material has been provided by the authors to give readers additional information about their work.

**eFigure 1.** Consort Flowchart of the AK801 Trial

Supplementary figure 1. Consort flow chart of the AK801 trial

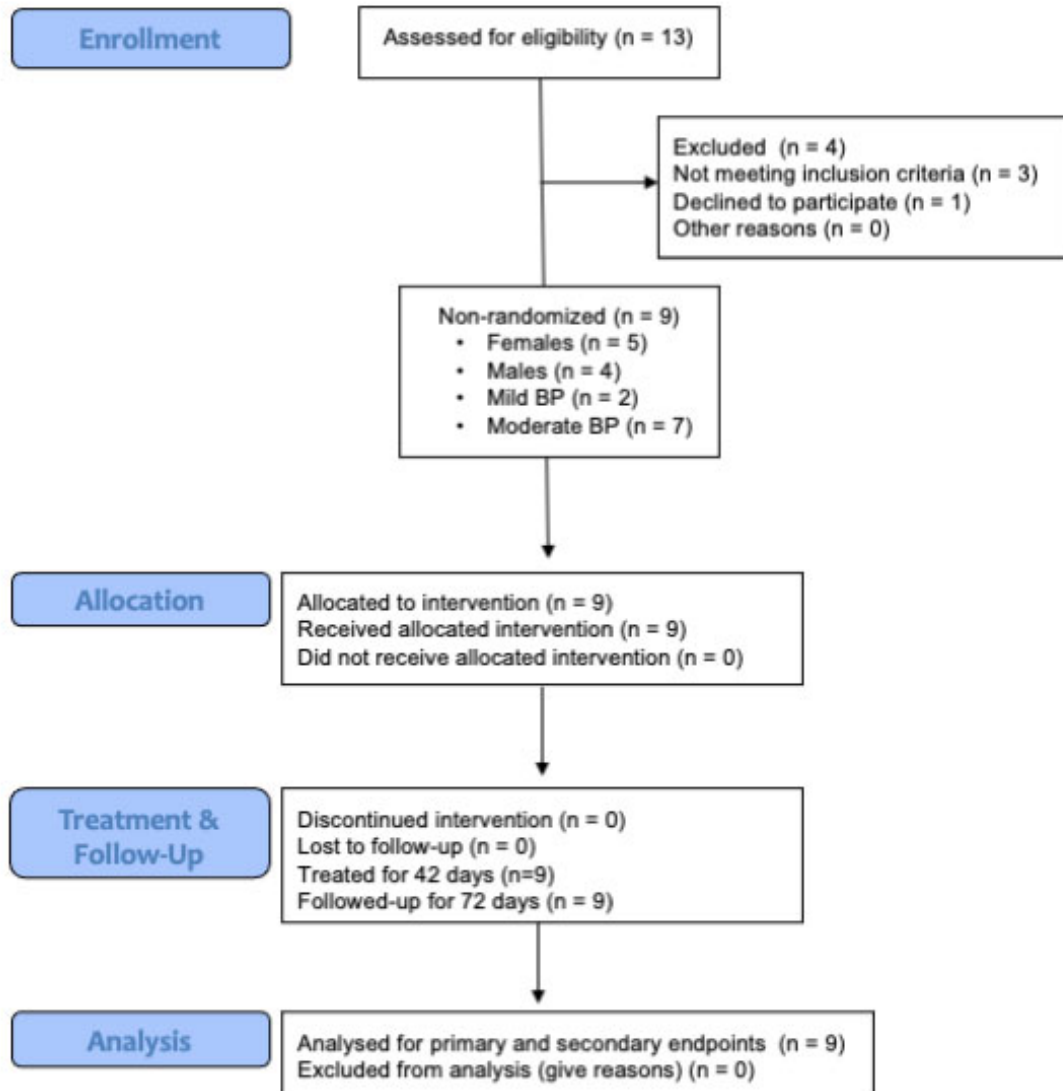

eFigure 2. BPDAI Subcomponent Scores Over Time for the 9 Patients in the Trial

Supplementary Figure 2

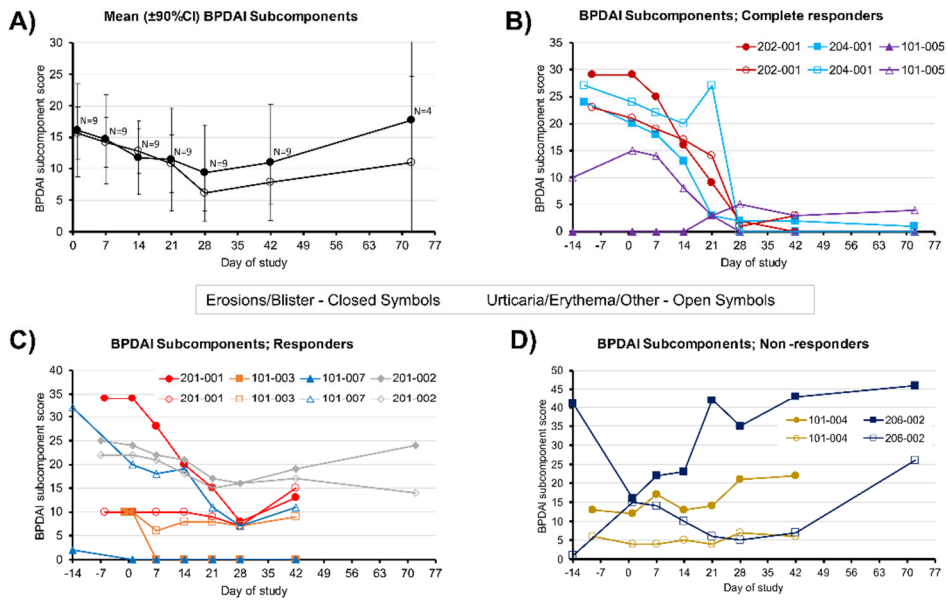

**eFigure 3.** Total LTB<sub>4</sub> Levels (nM) in the Plasma of Healthy Volunteers (HV), Bullous Pemphigoid (BP) Patients and Paroxysmal Nocturnal Hemoglobinuria (PNH) Patients While Being Treated With Nomacopan

Supplementary Figure 3

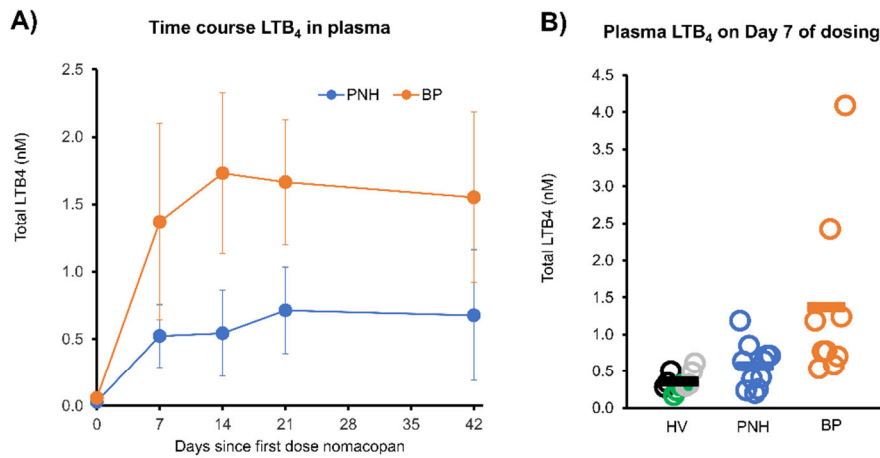

**eTable 1.** Immunopathological Features of the Study Subjects at Screening

| Patient ID | Response under nomacopan | DIF  |      | Epidermal binding on SSS | Serum levels (U/ml) |            |
|------------|--------------------------|------|------|--------------------------|---------------------|------------|
|            |                          | IgG  | C3   |                          | Anti-BP180          | Anti-BP230 |
| 101-005    | complete                 | +    | +    | +                        | 0                   | 22         |
| 204-001    | complete                 | n.d. | n.d. | +                        | 160*                | n.d.       |
| 201-001    | complete                 | -    | -    | +                        | 1                   | 38         |
| 202-001    | partial                  | +    | +    | +                        | 48                  | 120        |
| 101-003    | partial                  | +    | +    | +                        | 42                  | n.d.       |
| 101-007    | partial                  | +    | -    | +                        | 9                   | 0          |
| 201-002    | partial                  | +    | +    | +                        | 78                  | 5          |
| 101-004    | recalcitrant             | +    | n.d. | +                        | 7                   | 4          |
| 206-002    | recalcitrant             | +    | +    | +                        | 11                  | 1          |

DIF, direct immunofluorescence microscopy;

SSS, salt-split skin;

n.d., not done;

+, positive;

-, negative

**eTable 2.** Summary of Adverse Events (N = 9)

| <b>System Organ Class<br/>Derived Term</b>                           | <b>Number of<br/>patients (%)</b> |
|----------------------------------------------------------------------|-----------------------------------|
| Patients with any TEAEs                                              | 9 (100.0%)                        |
| <b><u>Infections &amp; Infestations</u></b>                          | <b><u>4 (44.4%)</u></b>           |
| Urinary tract infection                                              | 3 (33.3%)                         |
| Localised infection (knee)*                                          | 1 (11.1%)                         |
| Respiratory tract infection                                          | 1 (11.1%)                         |
| Influenza                                                            | 1 (11.1%)                         |
| Upper respiratory tract infection                                    | 1 (11.1%)                         |
| <b><u>General Disorders &amp; Administration Site Conditions</u></b> | <b><u>4 (44%)</u></b>             |
| Condition aggravated*†                                               | 2 (22.2%)                         |
| Oedema peripheral                                                    | 2 (22.2%)                         |
| Malaise                                                              | 1 (11.1%)                         |
| Feeling cold                                                         | 1 (11.1%)                         |
| Influenza like illness                                               | 1 (11.1%)                         |
| <b><u>Investigations</u></b>                                         | <b><u>4 (44.4%)</u></b>           |
| C-reactive protein increased                                         | 2 (22.2%)                         |
| Bacterial test positive                                              | 1 (11.1%)                         |
| Blood urea increased                                                 | 1 (11.1%)                         |
| Blood pressure increased                                             | 1 (11.1%)                         |
| Eosinophil count increased                                           | 1 (11.1%)                         |
| Neutrophil count increased                                           | 1 (11.1%)                         |
| White blood cell count increased                                     | 1 (11.1%)                         |
| <b><u>Skin and Subcutaneous Tissue Disorders</u></b>                 | <b><u>4 (44.4%)</u></b>           |
| Pruritus                                                             | 2 (22.2%)                         |
| Erythema                                                             | 1 (11.1%)                         |
| Lichen planus                                                        | 1 (11.1)                          |
| Skin ulcer                                                           | 1 (11.1)                          |
| Livedo reticularis                                                   | 1 (11.1)                          |
| <b><u>Nervous System Disorders</u></b>                               | <b><u>3 (33.3%)</u></b>           |
| Headache                                                             | 2 (22.2%)                         |
| Syncope                                                              | 1 (11.1%)                         |

|                                                          |                  |
|----------------------------------------------------------|------------------|
| Taste disorder                                           | 1 (11.1%)        |
|                                                          |                  |
| <u>Blood &amp; Lymphatic System Disorders</u>            | <u>2 (22.2%)</u> |
| Anaemia                                                  | 1 (11.1%)        |
| Eosinophilia                                             | 1 (11.1%)        |
| Lymphopenia                                              | 1 (11.1%)        |
|                                                          |                  |
| <u>Gastrointestinal Disorders</u>                        | <u>2 (22.2%)</u> |
| Diarrhoea                                                | 1 (11.1%)        |
| Faeces soft                                              | 1 (11.1%)        |
|                                                          |                  |
| <u>Injury, Poisoning &amp; Procedural Complications</u>  | <u>2 (22.2%)</u> |
| Fall                                                     | 1 (11.1%)        |
| Injury                                                   | 1 (11.1%)        |
| Burns first degree                                       | 1 (11.1%)        |
|                                                          |                  |
| <u>Metabolism &amp; Nutrition Disorders</u>              | <u>2 (22.2%)</u> |
| Hyperglycaemia                                           | 1 (11.1%)        |
| Hyponatraemia                                            | 1 (11.1%)        |
|                                                          |                  |
| <u>Musculoskeletal &amp; Connective Tissue Disorders</u> | <u>2 (22.2%)</u> |
| Joint swelling                                           | 1 (11.1%)        |
| Musculoskeletal stiffness                                | 1 (11.1%)        |
|                                                          |                  |
| <u>Cardiac Disorders</u>                                 | <u>1 (11.1%)</u> |
| Ventricular extrasystoles                                | 1 (11.1%)        |
|                                                          |                  |
| <u>Renal &amp; Urinary Disorders</u>                     | <u>1 (11.1%)</u> |
| Renal failure                                            | 1 (11.1%)        |
|                                                          |                  |
| <u>Vascular Disorders</u>                                | <u>1 (11.1%)</u> |
| Haematoma                                                | 1 (11.1%)        |

\* Serious adverse event.

† Worsening of existing disorder (BP)

**eTable 3. Summary of Disease Control and Number of New Lesions by Days of Nomacopan Treatment**

| Patient ID | Days after initiation of nomacopan |    |    |    |    |
|------------|------------------------------------|----|----|----|----|
|            | 7                                  | 14 | 21 | 28 | 42 |
| 202-001    |                                    |    |    |    |    |
| 204-001    |                                    |    |    |    |    |
| 101-005    |                                    |    | 1  |    |    |
| 201-001    |                                    |    |    |    |    |
| 101-003    |                                    |    |    | 1  | 2  |
| 101-007    |                                    |    |    |    |    |
| 201-002    | 2                                  | 2  |    | 4  |    |
| 101-004    | 4                                  | 3  | 3  | 5  |    |
| 206-002    | 15                                 | 12 | 7  | 7  | 12 |



**eTable 4.** Individual CH50 Values and Free Nomacopan Concentrations Immediately Before a Dose of Nomacopan

| Patient ID | Day 1             |                 | Day 7              |      | Day 14 |       | Day 21 |       | Day 42             |      | Day 72 |      |
|------------|-------------------|-----------------|--------------------|------|--------|-------|--------|-------|--------------------|------|--------|------|
|            | CH50 <sup>1</sup> | PK <sup>2</sup> | CH50               | PK   | CH50   | PK    | CH50   | PK    | CH50               | PK   | CH50   | PK   |
| 202-001    | 102.3             | -               | 58.4* <sup>a</sup> | 2.1  | <10    | 79.5  | <10    | 98.3  | 10.2               | 45.7 | 157.3  | <1.0 |
| 204-001    | 85.1              | <1.0            | <10                | 28.7 | <10    | 19.4  | <10    | 27.2  | <10                | 35.5 | -      | <1.0 |
| 101-005    | 132.8             | <1.0            | <10                | 36.8 | <10    | 32.2  | <10    | 63.8  | <10                | 23.4 | 98.9   | <1.0 |
| 201-001    | 232.1             | <1.0            | <10                | 90.9 | <10    | 81.5  | <10    | 103.0 | <10                | 91.8 | 197.7  | <1.0 |
| 101-003    | 91.4              | <1.0            | <10                | 60.5 | <10    | 104.0 | <10    | 115.0 | 49.3* <sup>b</sup> | 1.4  | 136.2  | <1.0 |
| 101-007    | 73.6              | <1.0            | 14.4*              | 99.7 | 10.1*  | 99.6  | <10    | 66.2  | <10                | 20.7 | -      | -    |
| 201-002    | 150.8             | <1.0            | <10 <sup>a</sup>   | 16.2 | <10    | 25.5  | 13.4*  | 11.0  | <10                | 18.7 | 171.9  | 1.0  |
| 101-004    | 157.6             | <1.0            | <10                | 52.5 | 10.3*  | 27.6  | <10    | 88.4  | <10                | 16.1 | 157.6  | <1.0 |
| 206-002    | 134.3             | <1.0            | <10                | 22.7 | <10    | 43.6  | <10    | 29.3  | 11.4*              | 79.9 | 65.4   | 1.4  |

<sup>1</sup> CH50 results – terminal complement activity measured by ELISA CH50 (U Eq/mL). Lower limit of quantification (LLOQ) 10 CH50 U Eq/mL.

<sup>2</sup> Pharmacokinetic (PK) results - free nomacopan concentration (ng/mL). LLOQ 1.00 ng/mL.

\*CH50 U Eq/mL above LLOQ.

<sup>a</sup> Patients 202-001 and 201-002 did not receive a full ablating dose of nomacopan on Day 1.

<sup>b</sup> Patient 101-003 very likely stopped dosing themselves prior to Day 42 as CH50 elevated, and C5 and LTB<sub>4</sub> lower than earlier timepoints (see Supplementary Fig 2).

**eTable 5.** Amount of Mometasone (g) Used Each Week by Each Patient Over the First 3 Weeks of Nomacopan Treatment

| Patient ID | Response under nomacopan | Mometasone (g) |        |        |
|------------|--------------------------|----------------|--------|--------|
|            |                          | Week 1         | Week 2 | Week 3 |
| 202-001    | complete                 | 2              | 6      | 7      |
| 204-001    | complete                 | 47             | 37     | 9      |
| 101-005    | complete                 | 7              | 0      | 0      |
| 201-001    | partial                  | 17             | 3      | 8      |
| 101-003    | partial                  | 20             | 20     | 0      |
| 101-007    | partial                  | 1              | 6      | 7      |
| 201-002    | partial                  | 0.5            | 2      | 0.5    |
| 101-004    | recalcitrant             | 0              | 17     | 17     |
| 206-002    | recalcitrant             | 0              | 30     | 30     |
