# Supplementary material
Source: PubMed Central journal article supplement (PMC9069343)
Supplement: jamadermatol-e221156-s003.pdf [file jamadermatol-e221156-s003.pdf]

## Data Sharing Statement

Sadik. Evaluation of Nomacopan for Treatment of Bullous Pemphigoid. *JAMA Dermatol.*  
Published May 04, 2022. doi:10.1001/jamadermatol.2022.1156

### Data

**Data available:** Yes

**Data types:** Deidentified participant data

**How to access data:** [christian.sadik@uksh.de](mailto:christian.sadik@uksh.de)

**When available:** With publication

### Supporting Documents

**Document types:** None

### Additional Information

**Who can access the data:** anyone requesting the data

**Types of analyses:** for any purpose

**Mechanisms of data availability:** with investigator support
